## CORRECTION

# Sonic hedgehog processing and release are regulated by glypican heparan sulfate proteoglycans

Corinna Ortmann, Ute Pickhinke, Sebastian Exner, Stefanie Ohlig, Roger Lawrence, Hamodah Jboor, Rita Dreier and Kay Grobe

There was an error published in *J. Cell Sci.* **128**, 2374-2385.

The reference Oustah et al. (2014) was cited incorrectly throughout the manuscript and in the reference list. Citations of Oustah et al. (2014) should read Al Oustah et al. (2014), and the correct reference is given below.

**Al Oustah, A., Danesin, C., Khouri-Farah, N., Farreny, M.-A., Escalas, N., Cochard, P., Glise, B. and Soula, C.** (2014). Dynamics of Sonic hedgehog signaling in the ventral spinal cord are controlled by intrinsic changes in source cells requiring Sulfatase 1. *Development* **141**, 1392-1403.

Journal of Cell Science and the authors apologise to the readers for any confusion that this error might have caused.



Special Issue on 3D Cell Biology  
Call for papers  
Submission deadline: January 16<sup>th</sup>, 2016  
Journal of Cell Science
